# Supplementary material for: O3 chemistry of 2,5-dimethylfuran: mechanism development
Source: Royal Society of Chemistry journal article supplement (doi:10.1039/d4ea00045e), 2024-01-01
Supplement: d4ea00045e1.pdf [file d4ea00045e1.pdf]

# O<sub>3</sub> chemistry of 2,5-dimethylfuran: Mechanism development

- Supporting Information -

*N. Illmann, and V. Rösgen*

## Table of Contents

|           |                                                              |    |
|-----------|--------------------------------------------------------------|----|
| <b>A.</b> | <b>Experimental conditions</b> .....                         | 2  |
| <b>B.</b> | <b>Rate coefficient calculation</b> .....                    | 3  |
| <b>C.</b> | <b>Calculation of the OH yield <math>\alpha</math></b> ..... | 4  |
| <b>D.</b> | <b>Quantification</b> .....                                  | 6  |
| 1.        | Absorption cross section determinations .....                | 6  |
| 2.        | Quantification of ketene (CH <sub>2</sub> =C=O) .....        | 7  |
| 3.        | List of cross sections .....                                 | 8  |
| <b>E.</b> | <b>Time profiles and product yield determination</b> .....   | 8  |
| <b>F.</b> | <b>Modelling</b> .....                                       | 16 |
| <b>G.</b> | <b>FTIR spectra</b> .....                                    | 18 |
| <b>H.</b> | <b>Time profiles of PTR-MS data</b> .....                    | 22 |
|           | <b>References</b> .....                                      | 26 |

## A. Experimental conditions

**Table S1** Summary of the conditions of all performed experiments.

| Experiment | Target                                      | Instrumentation             | Initial mixing ratios/<br>ppmV |      |
|------------|---------------------------------------------|-----------------------------|--------------------------------|------|
| EXP1       | Rate coefficient determination <sup>a</sup> | FTIR, PTR-MS                | 25DMF:                         | 1.1  |
|            |                                             |                             | E2B:                           | 1.4  |
|            |                                             |                             | cHexene:                       | 0.5  |
| EXP2       | Rate coefficient determination <sup>a</sup> | FTIR, PTR-MS                | 25DMF:                         | 1.1  |
|            |                                             |                             | E2B:                           | 1.5  |
|            |                                             |                             | cHexene:                       | 0.6  |
| EXP3       | Rate coefficient determination <sup>a</sup> | PTR-MS                      | 25DMF:                         | 0.4  |
|            |                                             |                             | E2B:                           | 0.7  |
|            |                                             |                             | cHexene:                       | 0.3  |
| EXP4       | OH production                               | FTIR                        | 25DMF:                         | 1.1  |
|            |                                             |                             | 135TMB:                        | 0.8  |
| EXP5       | OH production                               | FTIR                        | 25DMF:                         | 1.1  |
|            |                                             |                             | 135TMB:                        | 1.6  |
| EXP6       | OH production                               | FTIR                        | 25DMF:                         | 0.9  |
|            |                                             |                             | 135TMB:                        | 1.5  |
| EXP7       | OH production                               | PTR-MS, (FTIR) <sup>b</sup> | 25DMF:                         | 0.72 |
|            |                                             |                             | 135TMB:                        | 1.6  |
| EXP8       | OH production                               | PTR-MS, (FTIR) <sup>b</sup> | 25DMF:                         | 1.1  |
|            |                                             |                             | 135TMB:                        | 0.61 |
| EXP9       | OH production                               | PTR-MS, (FTIR) <sup>b</sup> | 25DMF:                         | 0.89 |
|            |                                             |                             | 135TMB:                        | 0.47 |
| EXP10      | OH production                               | PTR-MS, (FTIR) <sup>b</sup> | 25DMF:                         | 0.47 |
|            |                                             |                             | 135TMB:                        | 1.4  |
| EXP11      | OH production                               | PTR-MS, (FTIR) <sup>b</sup> | 25DMF:                         | 0.54 |
|            |                                             |                             | 135TMB:                        | 1.1  |
| EXP12      | Product formation <sup>a</sup>              | FTIR, PTR-MS                | 25DMF:                         | 1.2  |
| EXP13      | Product formation <sup>a</sup>              | FTIR, PTR-MS                | 25DMF:                         | 1.5  |
| EXP14      | Product formation <sup>a</sup>              | FTIR, PTR-MS                | 25DMF:                         | 1.1  |
| EXP15      | Product formation <sup>a</sup>              | FTIR                        | 25DMF:                         | 2.5  |
| EXP16      | Product formation <sup>a</sup>              | FTIR                        | 25DMF:                         | 2.1  |
| EXP17      | Product formation <sup>a</sup>              | FTIR                        | 25DMF:                         | 1.9  |
| EXP18      | Product formation <sup>a</sup>              | FTIR                        | 25DMF:                         | 3.9  |
| EXP19      | Product formation <sup>a</sup>              | FTIR                        | 25DMF:                         | 3.3  |
|            |                                             |                             | SO <sub>2</sub> :              | 4.2  |
| EXP20      | Product formation <sup>a</sup>              | FTIR                        | 25DMF:                         | 3.3  |
|            |                                             |                             | SO <sub>2</sub> :              | 5.8  |
| EXP21      | Rate coefficient determination <sup>a</sup> | FTIR                        | 25DMF:                         | 3.2  |
|            |                                             |                             | E2B:                           | 2.1  |
|            |                                             |                             | SO <sub>2</sub> :              | 5.9  |

<sup>a</sup> Experiments were performed in the presence of about 2 % CO to scavenge OH radicals, <sup>b</sup> FTIR was used only to determine initial reactant concentrations.

## B. Rate coefficient calculation

**Table S2** Summary of the results from the relative kinetic experiments (EXP1-EXP3, EXP21).

| Experiment | Reference         | Instrumentation | Rate coefficient ratio | $k \times 10^{16}/\text{cm}^3 \text{ molecule}^{-1} \text{ s}^{-1}$ |
|------------|-------------------|-----------------|------------------------|---------------------------------------------------------------------|
| EXP1       | <i>E2</i> -Butene | FTIR            | $1.34 \pm 0.20$        | $2.7 \pm 0.8^a$                                                     |
|            | <i>E2</i> -Butene | PTR-MS          | $1.74 \pm 0.09$        | $3.5 \pm 0.9^a$                                                     |
|            | Cyclohexene       | PTR-MS          | $3.91 \pm 0.47$        | $3.0 \pm 0.6^a$                                                     |
| EXP2       | <i>E2</i> -Butene | FTIR            | $1.69 \pm 0.26$        | $3.4 \pm 1.0^a$                                                     |
|            | <i>E2</i> -Butene | PTR-MS          | $1.70 \pm 0.08$        | $3.4 \pm 0.9^a$                                                     |
|            | Cyclohexene       | PTR-MS          | $4.15 \pm 0.61$        | $3.2 \pm 0.7^a$                                                     |
| EXP3       | <i>E2</i> -Butene | PTR-MS          | $1.47 \pm 0.10$        | $2.9 \pm 0.8^a$                                                     |
|            | Cyclohexene       | PTR-MS          | $4.03 \pm 0.26$        | $3.1 \pm 0.5^a$                                                     |
| EXP21      | <i>E2</i> -Butene | FTIR            | $1.89 \pm 0.14$        | $3.8 \pm 1.0^a$                                                     |
|            |                   |                 | <b>average</b>         | <b><math>3.3 \pm 1.0^b</math></b>                                   |

<sup>a</sup> The error ( $2\sigma$ ) consists of combination of the statistical uncertainty derived from regression analysis and the uncertainty of  $k_{\text{ref}}$ . <sup>b</sup> The final rate coefficient represents the mean weighted by the errors resulting from regression analysis. The associated error represents a preferred expanded uncertainty of 30 %.

### C. Calculation of the OH yield $\alpha$

OH radicals formed from the ozonolysis of 2,5-dimethylfuran (25DMF) react, in principle, with any reactive VOC present in the reaction system. However, in the initial phase of the reaction OH will react almost exclusively with 1,3,5-trimethylbenzene (135TMB) and 2,5-dimethylfuran since both are highly reactive towards OH radicals and their concentrations exceed product concentrations by at least one order of magnitude. Accordingly, the OH chemistry is represented reasonably by reactions (R1) – (R3) for the initial phase of the reaction.

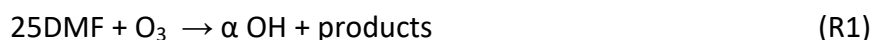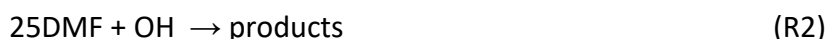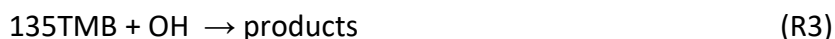

Consequently, the OH production ( $P_{OH}$ ) and loss rate ( $L_{OH}$ ) are given by

$$P_{OH} = \alpha \times k_1 \times [25DMF] \times [O_3] \quad (1)$$

$$L_{OH} = k_2 \times [25DMF] \times [OH] + k_3 \times [135TMB] \times [OH] \quad (2)$$

The linearity of  $\ln([135TMB]_0/[135TMB]_t)$  vs. time from data collected after one single  $O_3$  injection justifies the assumption of a steady-state OH concentration within statistical uncertainties. It applies Eq. (3).

$$\frac{d[OH]}{dt} = P_{OH} - L_{OH} = 0 \quad (3)$$

Combining Equations (1) – (3) yields an equation which allows to calculate the OH yield  $\alpha$ .

$$\alpha = \frac{[OH](k_2[25DMF] + k_3[135TMB])}{k_1[25DMF][O_3]} \quad (4)$$

Since 2,5-dimethylfuran was shown to be highly reactive towards ozone,  $[O_3]$  is rather low during the experiments. As a consequence, the quantification by FTIR becomes inaccurate. Yet, Eq. (4) can be rewritten as

$$\alpha = \frac{[OH](k_2[25DMF] + k_3[135TMB])}{\beta k'[25DMF]} \quad (5)$$

where  $k'$  represents the pseudo-first order loss of 2,5-dimethylfuran observed in the experiment after a single  $O_3$  injection. Since  $k'$  represents the overall loss rate due to both  $O_3$  and OH reaction, a correction factor  $\beta$  must be included, which represents the fraction of loss due to the ozonolysis reaction. The correction factor  $\beta$  is derived from a plot of  $\ln([25DMF]_0/[25DMF]_t)$  vs.  $\ln([135TMB]_0/[135TMB]_t) - k_{wall} \times t$ . Exemplary plots used for the calculation of  $\alpha$  are shown below (Fig. S1).

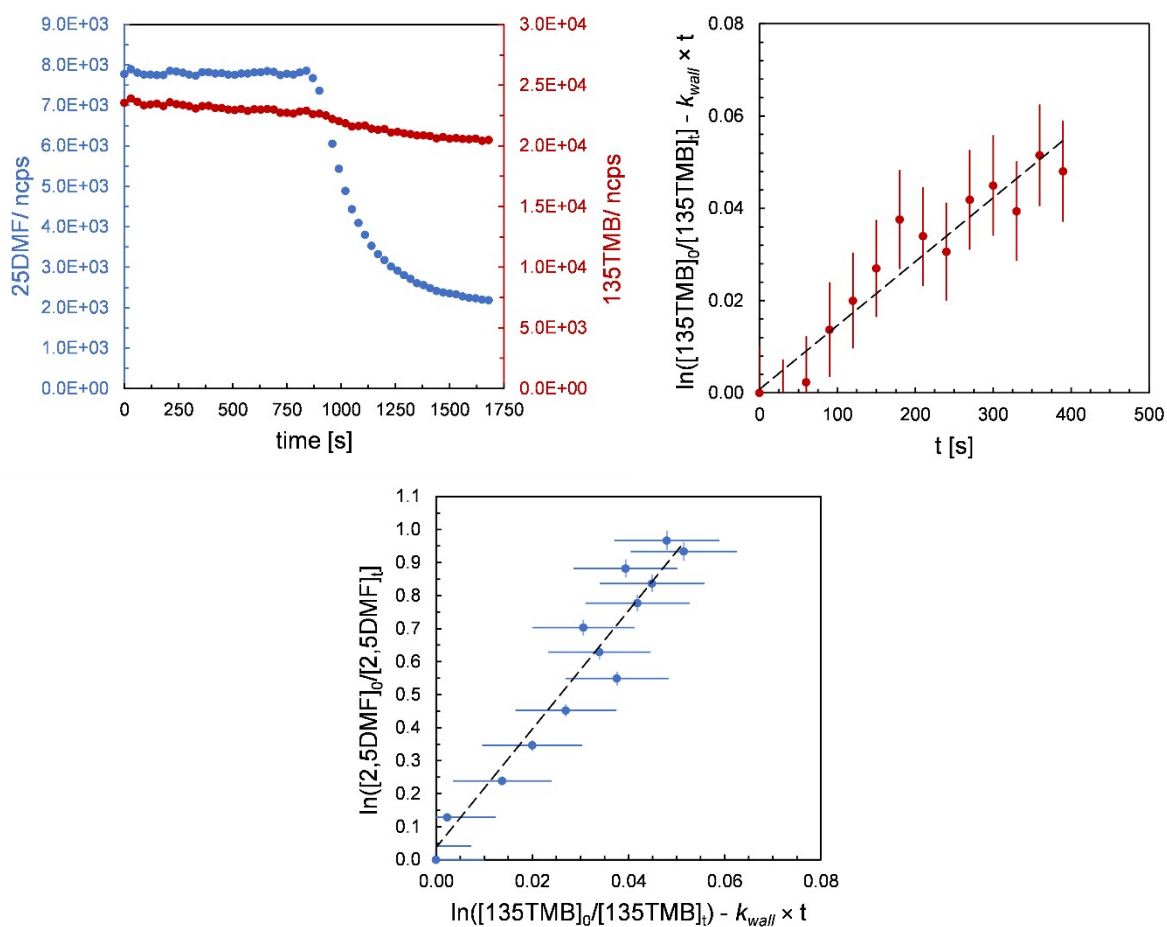

**Fig. S1** Upper left: Time profile of 2,5-dimethylfuran (25DMF) and 1,3,5-trimethylbenzene (135TMB) recorded with the PTR-ToF-MS in E11. Upper right: Logarithmic plot of 135TMB after injection of O<sub>3</sub>. Lower panel: Plot of 25DMF vs. 135TMB used for the calculation of  $\beta$ .

## D. Quantification

### 1. Absorption cross section determination

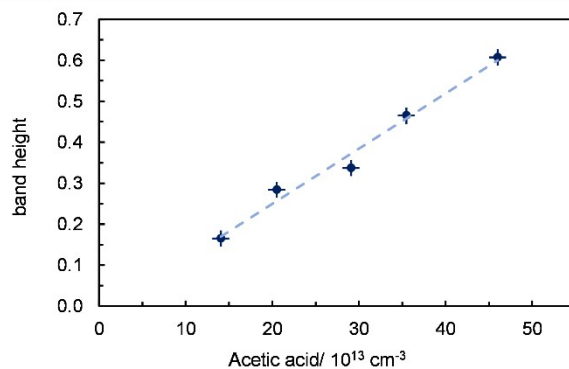

**Fig. S3** Correlation between the height of the absorption band at 1177 cm<sup>-1</sup> and the concentration of acetic acid (at an optical path length of 51.0 m).

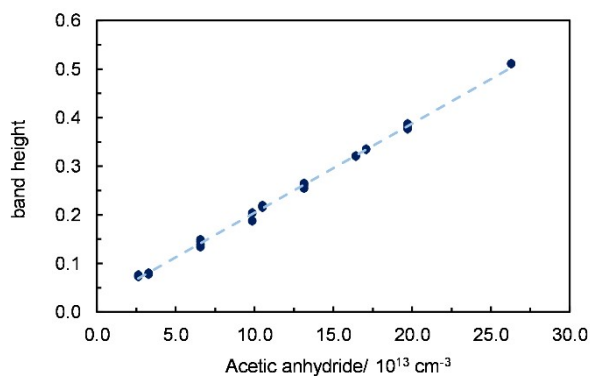

**Fig. S3** Correlation between the height of the absorption band at 1778 cm<sup>-1</sup> and the concentration of acetic anhydride (at an optical path length of 51.0 m).

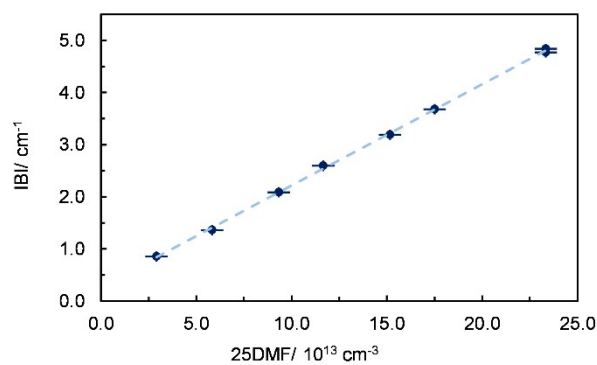

**Fig. S4** Correlation between the integrated band intensity (IBI) in the range 1060–880  $\text{cm}^{-1}$  and the concentration of 2,5-dimethylfuran (at an optical path length of 51.0 m).

## 2. Quantification of ketene ( $\text{CH}_2=\text{C}=\text{O}$ )

Information on the quantification of gaseous ketene were, to the best of our knowledge, published in four studies.<sup>1-4</sup> Two of them reported infrared absorption cross sections<sup>1,2</sup> whereas the other two provided quantitative IR spectra.<sup>3,4</sup>

Tuazon et al.<sup>2</sup> estimated a value of  $8.5 \times 10^{-18} \text{ cm}^2 \text{ molecule}^{-1}$  (base 10) for the P-branch maximum at 2151.8  $\text{cm}^{-1}$  based on the printed spectrum of Halverson and Williams<sup>3</sup>. The assignment is probably a typo since the peak maximum at about 2152  $\text{cm}^{-1}$  does correspond clearly to the Q-branch in the published spectrum as well as in a reference spectrum from our laboratory (Fig. S5). Following the procedure of Tuazon et al.<sup>2</sup> we derived cross sections of about  $7.8 \times 10^{-19}$  and  $9.0 \times 10^{-19} \text{ cm}^2 \text{ molecule}^{-1}$  (base 10) for the P-branch and R-branch maximum, respectively. Being estimated from a printed spectrum published back in 1947, these values exhibit significant uncertainty. However, we estimate the error based on deriving a value for the transmission is  $< 15\%$ . Since Tuazon et al.<sup>2</sup> rely on the same data we do not see any other conclusion than assuming a typo in the previous study, which stated a ten times larger value.

Applying the same methodology to the printed quantitative IR spectrum of Wallington et al.<sup>4</sup>, we derive absolute cross sections of about  $7.6 \times 10^{-19}$  and  $1.0 \times 10^{-18} \text{ cm}^2 \text{ molecule}^{-1}$  (base 10) for the P-branch and R-branch maximum, respectively. Accordingly, both reported IR spectra yield nearly the same absolute cross sections for the R-branch maximum (2164  $\text{cm}^{-1}$ ) considering the uncertainty from estimating the transmission from a printed spectrum. In the case of the P-branch maximum (2137  $\text{cm}^{-1}$ ), the estimated values are identical.

The absolute cross section of Hatakeyama et al.<sup>1</sup> (for the R-branch maximum at 2164  $\text{cm}^{-1}$ ) is about 40 % larger than our estimation from the spectrum of Halverson and Williams<sup>3</sup>. Since both published IR spectra yielded consistent values, it appears that Hatakeyama et al.<sup>1</sup> might have overestimated the ketene concentration. In the absence of additional data, we combined our estimated cross sections and used an average value of  $7.7 \times 10^{-19} \text{ cm}^2 \text{ molecule}^{-1}$ .

<sup>1</sup> (base 10) for the P-branch maximum at 2137 cm<sup>-1</sup>. However, we prefer to assign an accuracy error of about 20 %.

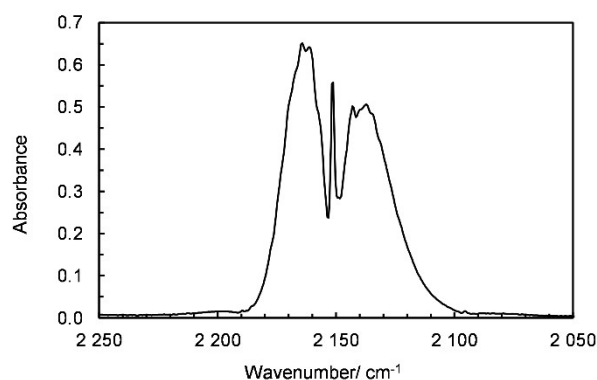

**Fig. S5** Reference spectrum of gas-phase ketene showing the main absorption structure.

### 3. Cross sections

**Table S3** Absolute and integrated absorption cross sections (base 10) used for the quantification via FTIR spectroscopy.

| Species              | Range / cm <sup>-1</sup> | Integrated cross section / cm molecule <sup>-1</sup> | Absolute cross section / cm <sup>2</sup> molecule <sup>-1</sup> | Reference |
|----------------------|--------------------------|------------------------------------------------------|-----------------------------------------------------------------|-----------|
| Acetic acid          | 1177                     |                                                      | $(2.6 \pm 0.3) \times 10^{-19}$                                 | a         |
| Acetic anhydride     | 1778                     |                                                      | $(3.6 \pm 0.2) \times 10^{-19}$                                 | a         |
| 2,5-Dimethylfuran    | 1060–880                 | $(3.8 \pm 0.2) \times 10^{-18}$                      |                                                                 | a         |
| Formaldehyde         | 1820–1660                | $(5.4 \pm 0.3) \times 10^{-18}$                      |                                                                 | b         |
| Glyoxal              | 2940–2724                | $(7.2 \pm 0.3) \times 10^{-18}$                      |                                                                 | 5         |
| Ketene               | 2137                     |                                                      | $7.7 \times 10^{-19}$                                           | c         |
| Methyl glyoxal       | 1880–1600                | $(1.31 \pm 0.02) \times 10^{-17}$                    |                                                                 | 6         |
| Methyl hydroperoxide | 2961                     |                                                      | $(1.09 \pm 0.07) \times 10^{-19}$                               | b         |

<sup>a</sup> Determined within this work, <sup>b</sup> Wuppertal laboratory database, <sup>c</sup> see text above.

## E. Time profiles and product yield determination



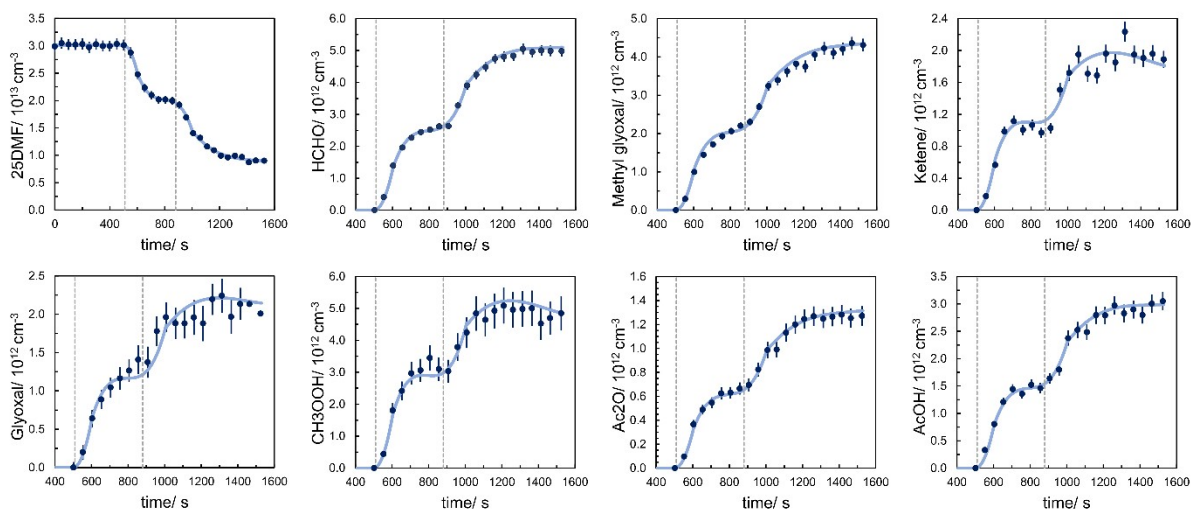

**Fig. S6** Concentration-time profiles of quantified species in EXP12. Dark blue dots represent measured data (FTIR) together with the respective statistical uncertainty ( $2\sigma$ ). The light blue lines represent the modelled time profiles (best-fit) considering a constant formation yield and a first-order wall loss. The vertical dotted lines mark the respective start of  $O_3$  addition for a period of about 1 min.

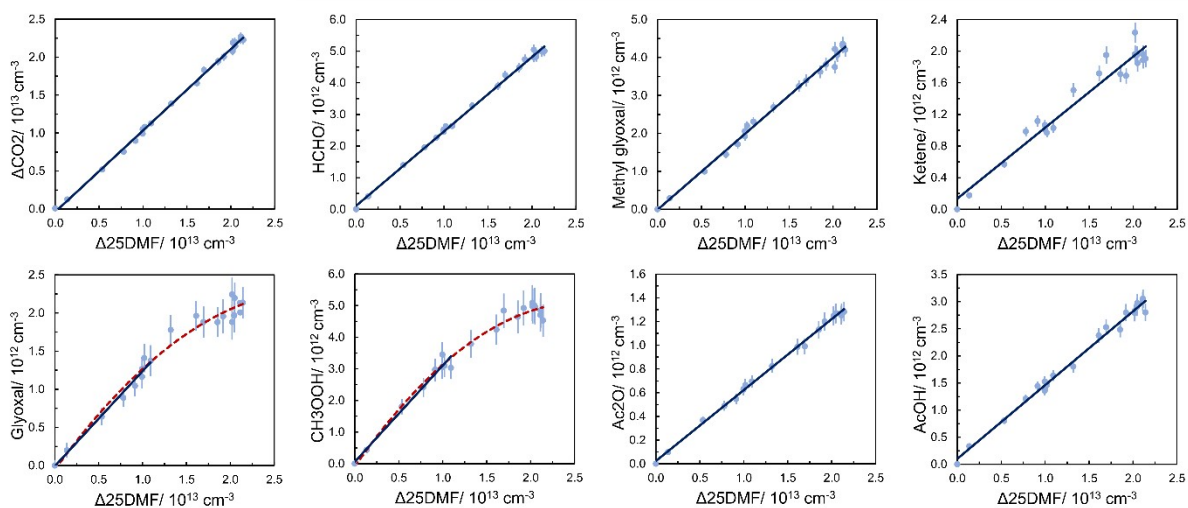

**Fig. S7** Yield plots of quantified species in EXP12. Light blue dots represent measured data (FTIR) together with the respective statistical uncertainty ( $2\sigma$ ). The solid blue lines represent the linear fit obtained through regression analysis. The dotted red lines represent polynomial functions to aid visual inspection of the non-linearity.

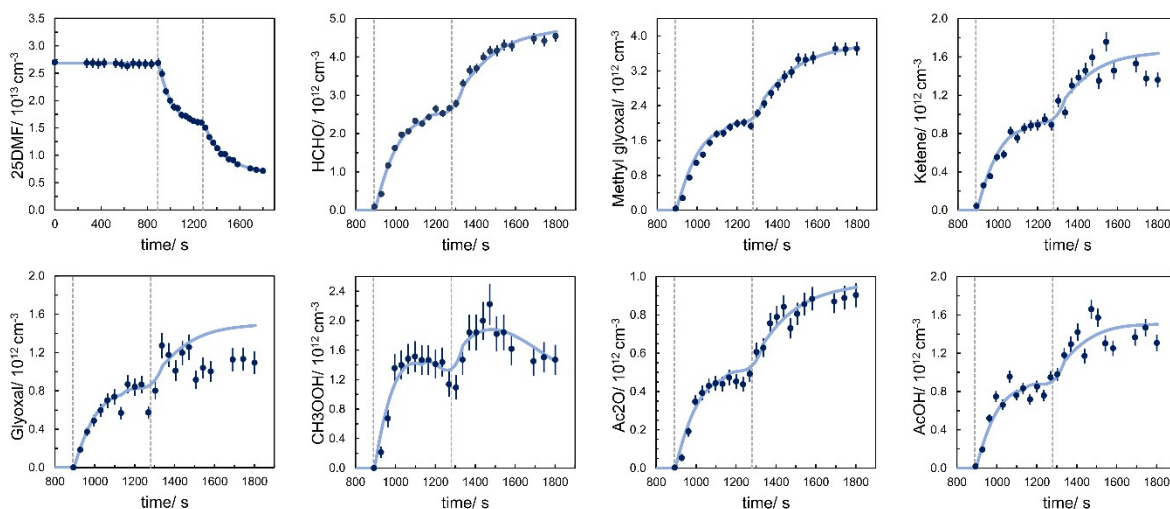

**Fig. S8** Concentration-time profiles of quantified species in EXP14. Dark blue dots represent measured data (FTIR) together with the respective statistical uncertainty ( $2\sigma$ ). The light blue lines represent the modelled time profiles (best-fit) considering a constant formation yield and a first-order wall loss. The vertical dotted lines mark the respective start of  $O_3$  addition for a period of about 1 min.

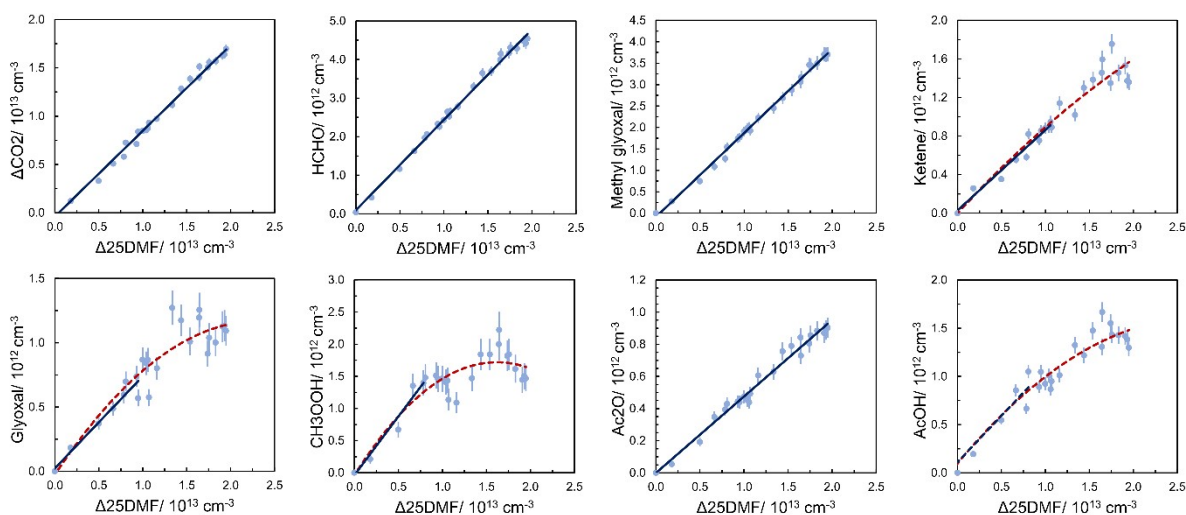

**Fig. S9** Yield plots of quantified species in EXP14. Light blue dots represent measured data (FTIR) together with the respective statistical uncertainty ( $2\sigma$ ). The solid blue lines represent the linear fit obtained through regression analysis. The dotted red lines represent polynomial functions to aid visual inspection of the non-linearity.

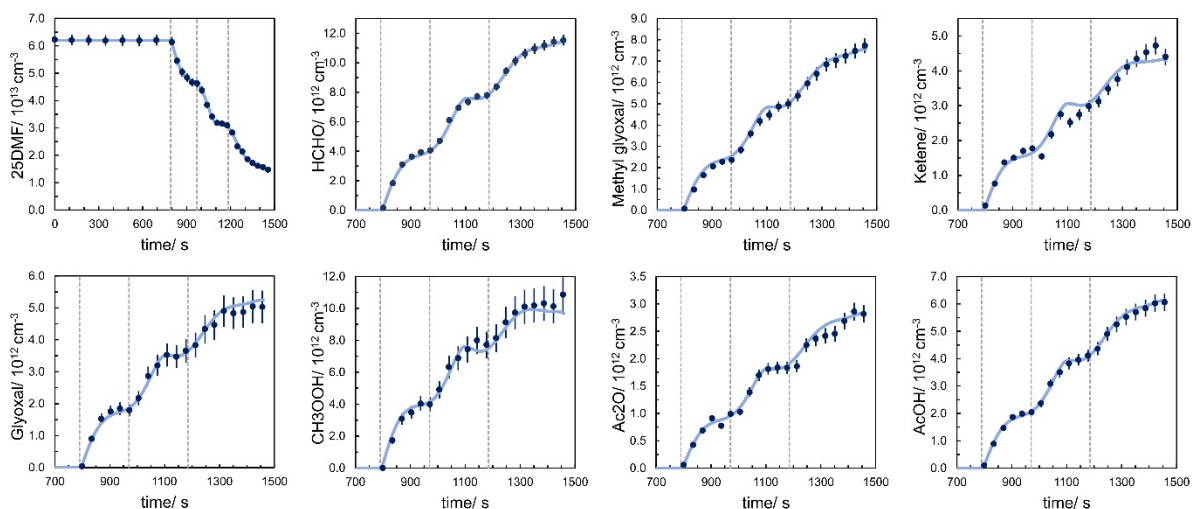

**Fig. S10** Concentration-time profiles of quantified species in EXP15. Dark blue dots represent measured data (FTIR) together with the respective statistical uncertainty ( $2\sigma$ ). The light blue lines represent the modelled time profiles (best-fit) considering a constant formation yield and a first-order wall loss. The vertical dotted lines mark the respective start of  $O_3$  addition for a period of about 1 min.

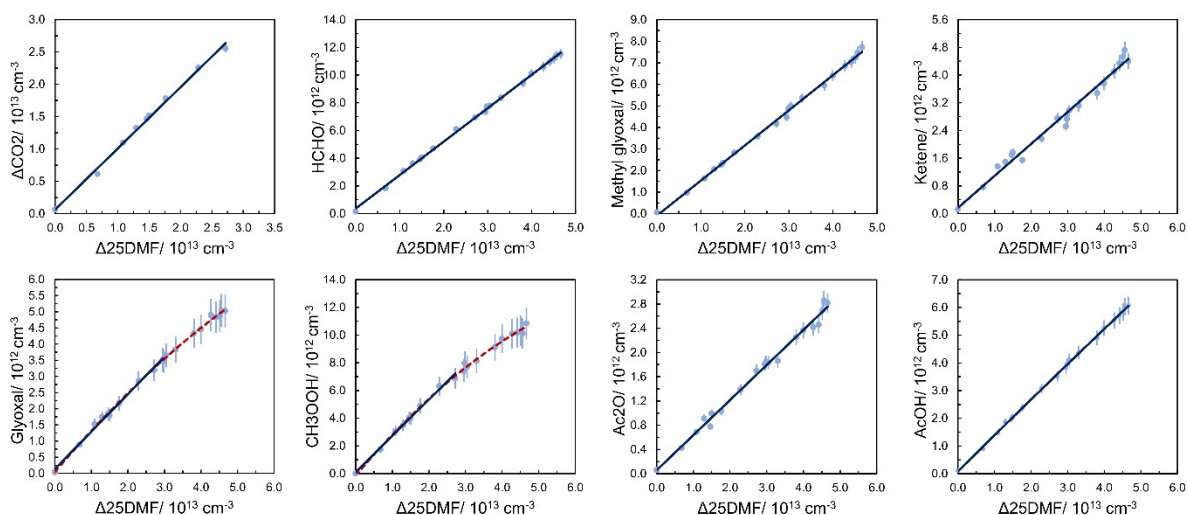

**Fig. S11** Yield plots of quantified species in EXP15. Light blue dots represent measured data (FTIR) together with the respective statistical uncertainty ( $2\sigma$ ). The solid blue lines represent the linear fit obtained through regression analysis. The dotted red lines represent polynomial functions to aid visual inspection of the non-linearity.

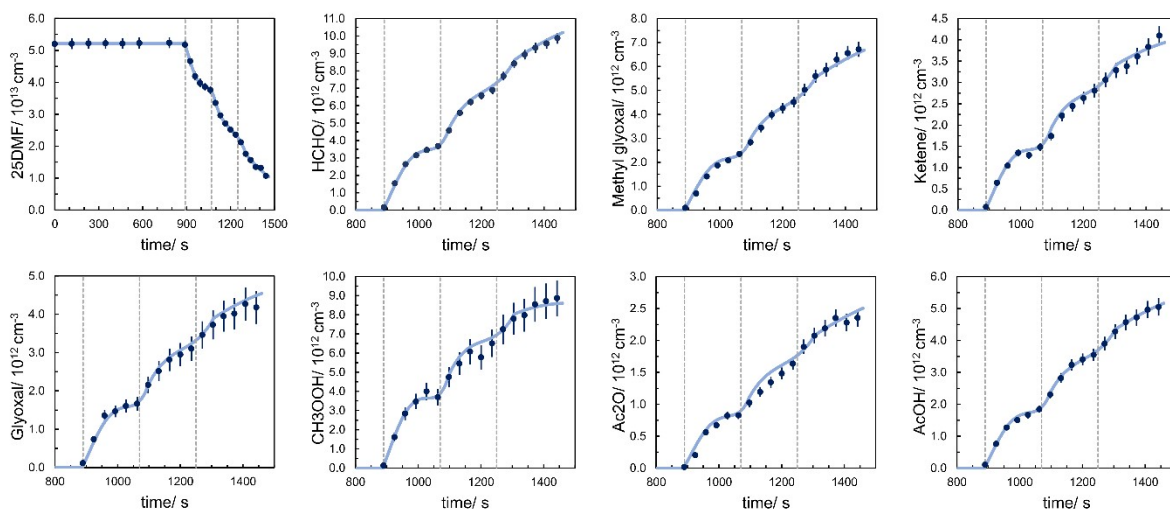

**Fig. S12** Concentration-time profiles of quantified species in EXP16. Dark blue dots represent measured data (FTIR) together with the respective statistical uncertainty ( $2\sigma$ ). The light blue lines represent the modelled time profiles (best-fit) considering a constant formation yield and a first-order wall loss. The vertical dotted lines mark the respective start of  $O_3$  addition for a period of about 1 min.

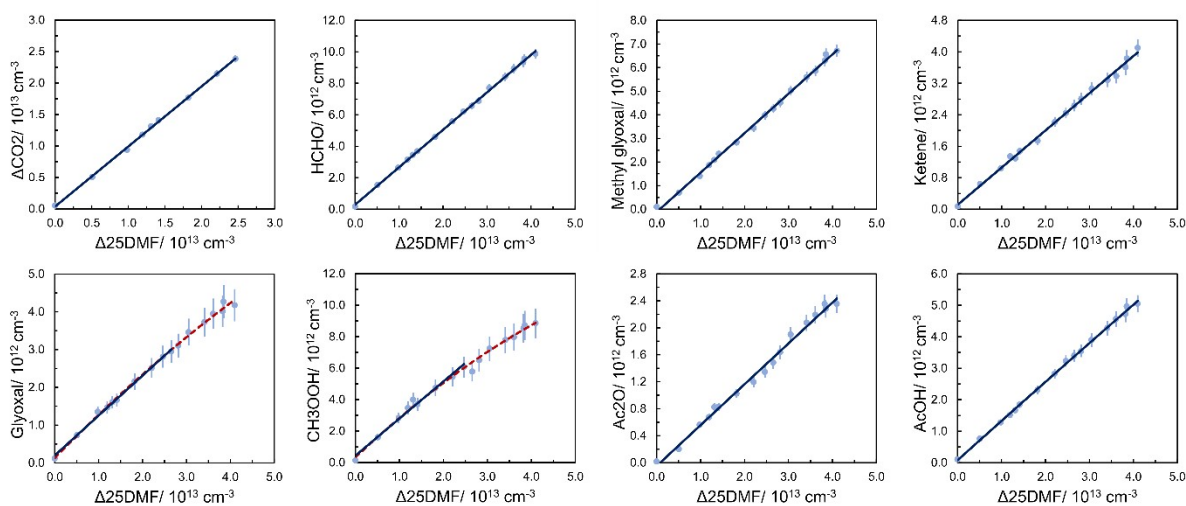

**Fig. S13** Yield plots of quantified species in EXP16. Light blue dots represent measured data (FTIR) together with the respective statistical uncertainty ( $2\sigma$ ). The solid blue lines represent the linear fit obtained through regression analysis. The dotted red lines represent polynomial functions to aid visual inspection of the non-linearity.

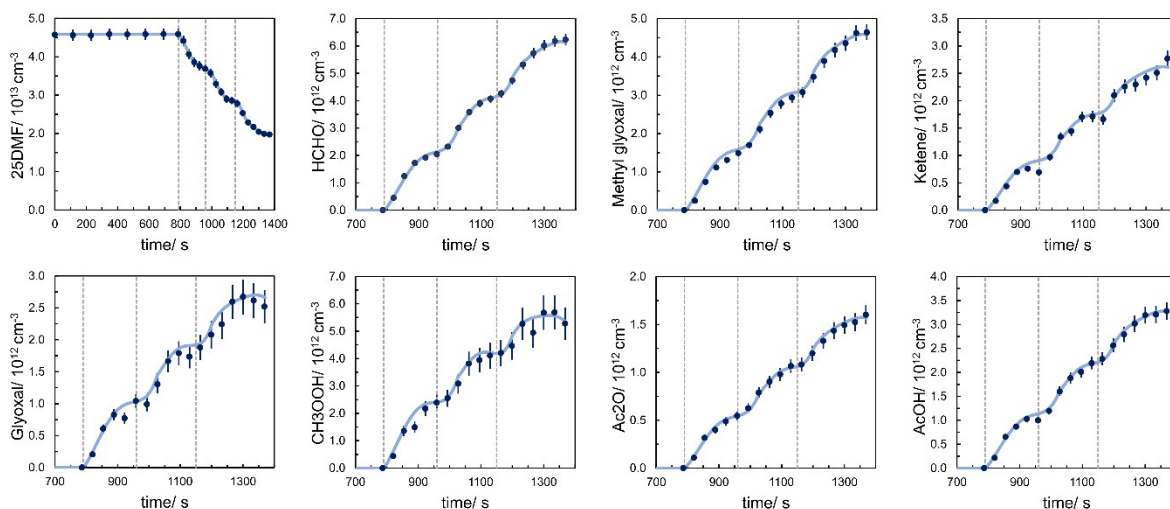

**Fig. S14** Concentration-time profiles of quantified species in EXP17. Dark blue dots represent measured data (FTIR) together with the respective statistical uncertainty ( $2\sigma$ ). The light blue lines represent the modelled time profiles (best-fit) considering a constant formation yield and a first-order wall loss. The vertical dotted lines mark the respective start of  $O_3$  addition for a period of about 1 min.

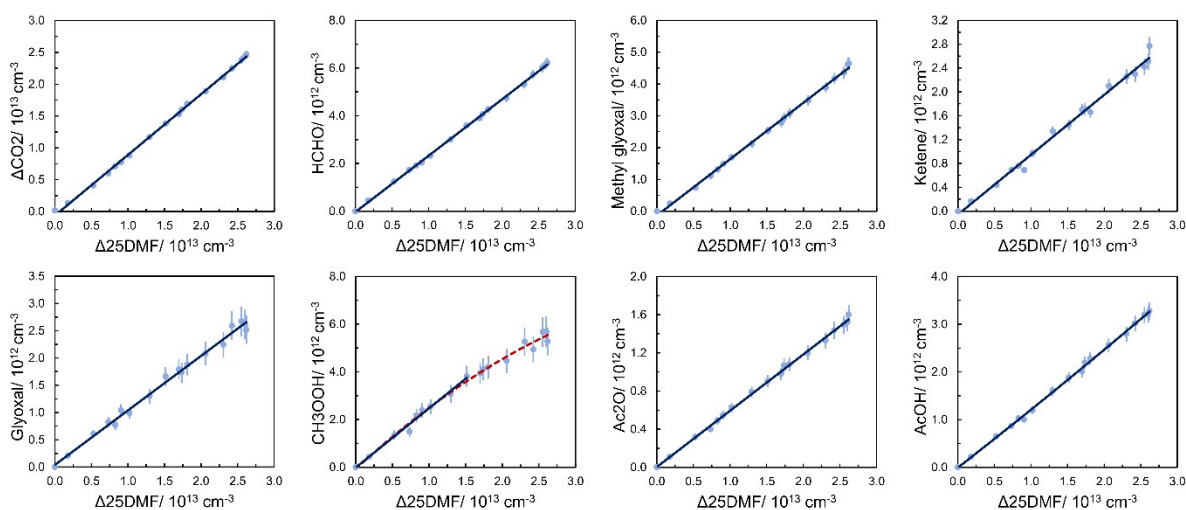

**Fig. S15** Yield plots of quantified species in EXP17. Light blue dots represent measured data (FTIR) together with the respective statistical uncertainty ( $2\sigma$ ). The solid blue lines represent the linear fit obtained through regression analysis. The dotted red lines represent polynomial functions to aid visual inspection of the non-linearity.

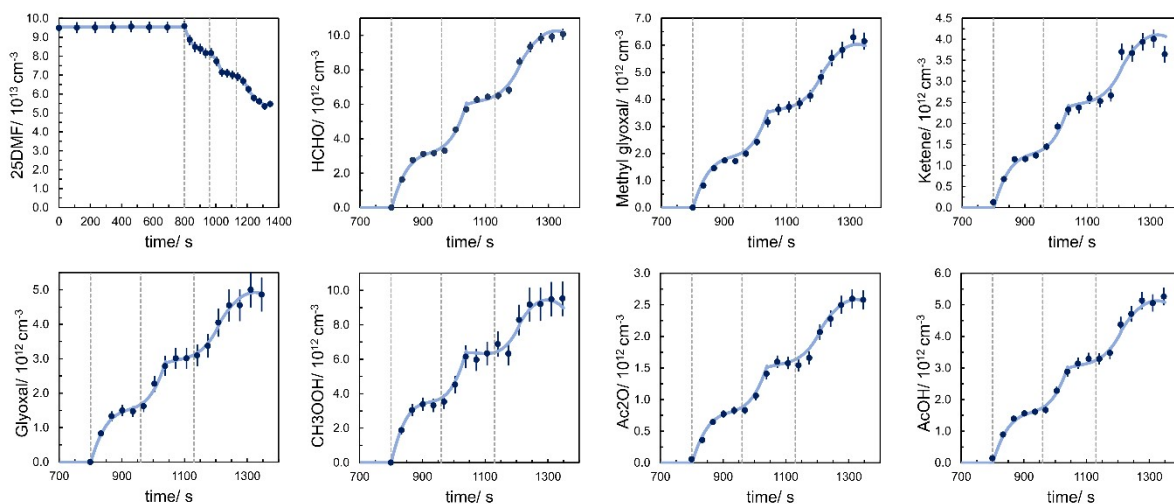

**Fig. S16** Concentration-time profiles of quantified species in EXP18. Dark blue dots represent measured data (FTIR) together with the respective statistical uncertainty ( $2\sigma$ ). The light blue lines represent the modelled time profiles (best-fit) considering a constant formation yield and a first-order wall loss. The vertical dotted lines mark the respective start of  $O_3$  addition for a period of about 1 min.

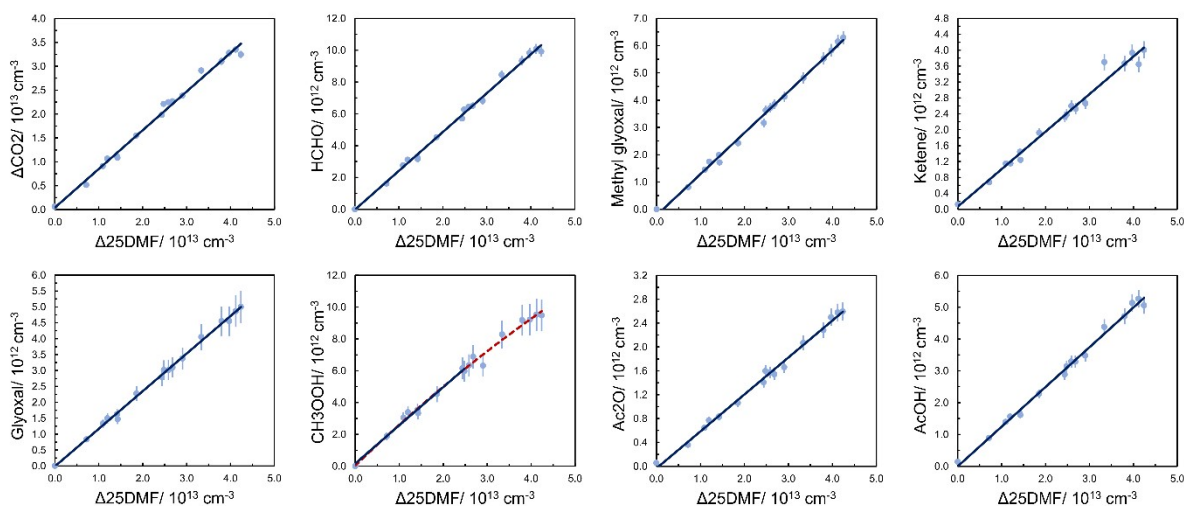

**Fig. S17** Yield plots of quantified species in EXP18. Light blue dots represent measured data (FTIR) together with the respective statistical uncertainty ( $2\sigma$ ). The solid blue lines represent the linear fit obtained through regression analysis. The dotted red lines represent polynomial functions to aid visual inspection of the non-linearity.

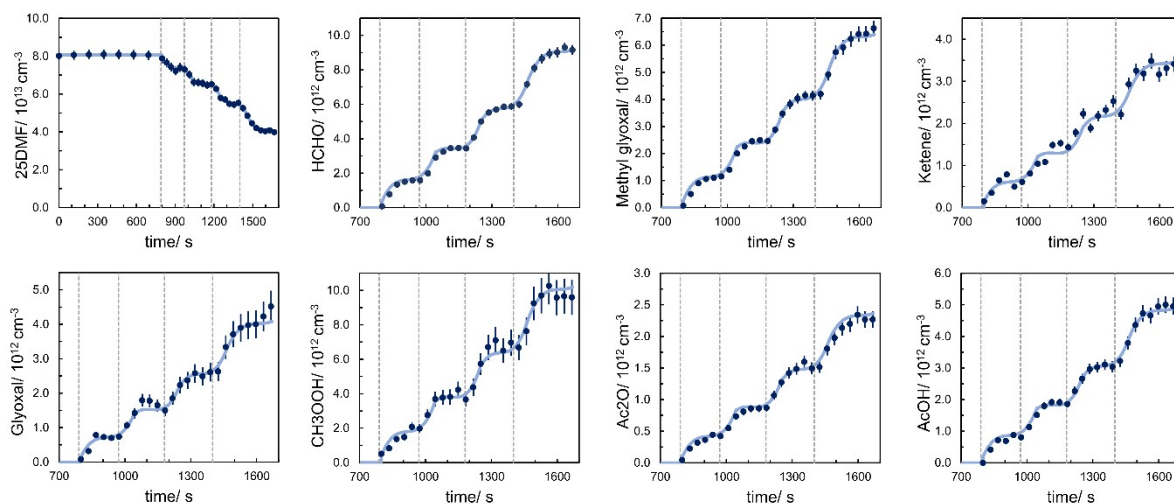

**Fig. S18** Concentration-time profiles of quantified species in EXP19. Dark blue dots represent measured data (FTIR) together with the respective statistical uncertainty ( $2\sigma$ ). The light blue lines represent the modelled time profiles (best-fit) considering a constant formation yield and a first-order wall loss. The vertical dotted lines mark the respective start of  $O_3$  addition for a period of about 1 min.

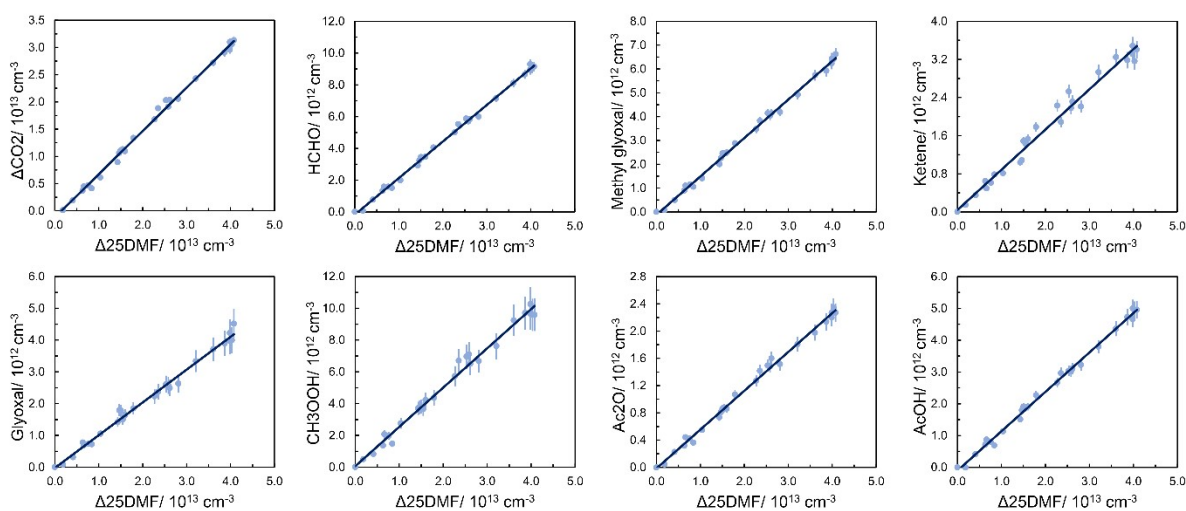

**Fig. S19** Yield plots of quantified species in EXP19. Dark blue dots represent measured data (FTIR) together with the respective statistical uncertainty ( $2\sigma$ ). The solid blue lines represent the linear fit obtained through regression analysis.

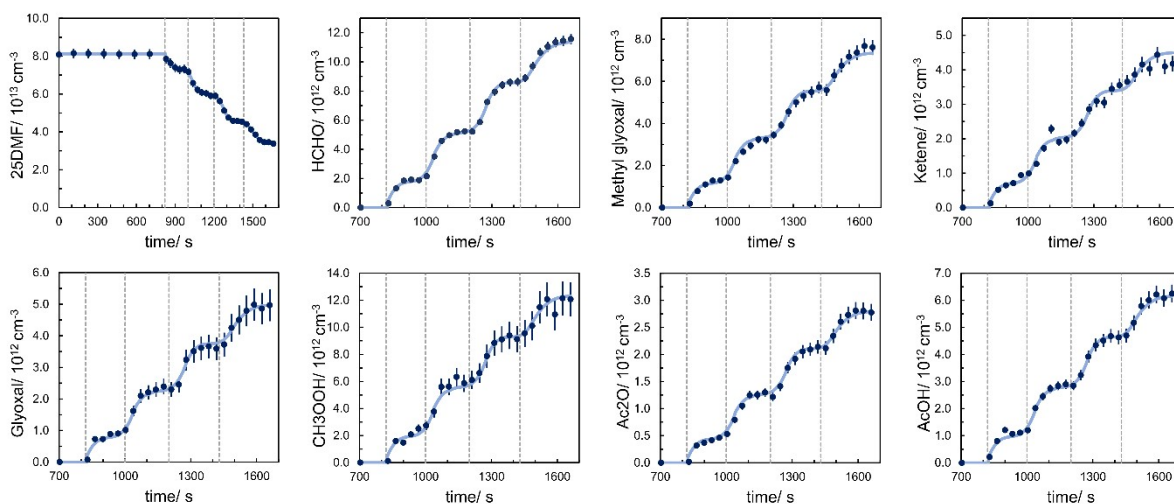

**Fig. S20** Concentration-time profiles of quantified species in EXP20. Dark blue dots represent measured data (FTIR) together with the respective statistical uncertainty ( $2\sigma$ ). The light blue lines represent the modelled time profiles (best-fit) considering a constant formation yield and a first-order wall loss. The vertical dotted lines mark the respective start of  $O_3$  addition for a period of about 1 min.

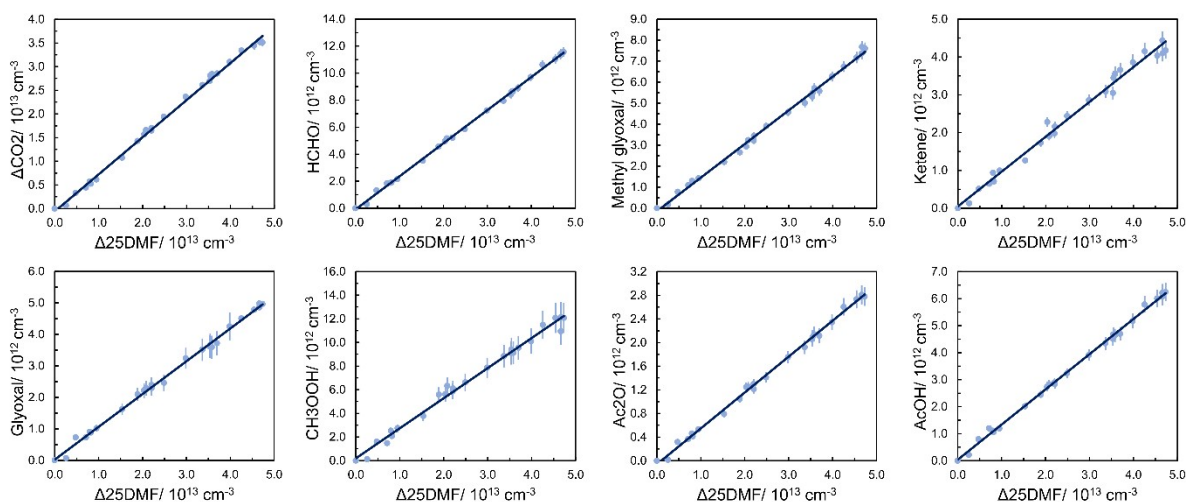

**Fig. S21** Yield plots of quantified species in EXP20. Light blue dots represent measured data (FTIR) together with the respective statistical uncertainty ( $2\sigma$ ). The solid blue lines represent the linear fit obtained through regression analysis.

## F. Modelling

In order to check if we are able to explain non-linearity observed in some yield plots by assuming a unimolecular wall loss, we simulated the time profiles using a simplified modelling approach<sup>7</sup>, which is based on the Euler-Cauchy method. In practice, concentration changes



$\Delta c$  are calculated for each time interval using an Excel® spreadsheet in order to obtain time profiles for each species. Given its purpose, the mechanism behind the model is a simplified reaction scheme assuming that a product  $P_n$  is formed by the ozonolysis reaction with a constant formation yield  $\gamma_n$  and potentially lost by an irreversible first-order wall loss:

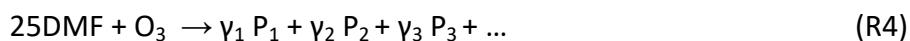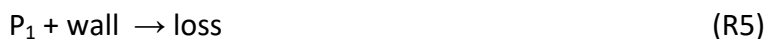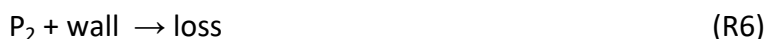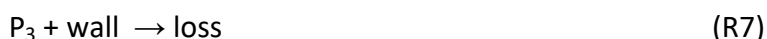

Both, the formation yield  $\gamma_n$  and the wall loss rate coefficient  $k_{\text{wall},n}$  for the species  $P_n$  are included as parameters, which are varied until a match between the experimental data and the simulated time profile is achieved if possible. This procedure relies on the assumption that the time profile of a product is dominated by the formation immediately after the  $\text{O}_3$  injection whereas a potential wall loss dominates once the reaction rate slows down significantly. Since  $\text{O}_3$  is almost entirely consumed during the reaction and up to four  $\text{O}_3$  injections were necessary in the experiments, we cannot use a steady-state oxidant concentration for the calculations of  $\Delta c$ . Instead, the time profile of 2,5-dimethylfuran is fitted by second or third order polynomials chosen to reproduce the experimental values over a certain reaction time, i.e. between the  $\text{O}_3$  injections. The parameters used to describe the time profiles of products are summarized in Tab. S4.

**Table S4** Product yields obtained through regression analysis and yield and wall loss parameters obtained through modelling for all product study experiments (EXP12 – EXP20).

| Experiment |                     | HCHO                              | Methyl glyoxal     | Ketene                            | Glyoxal                           | CH <sub>3</sub> OOH                 | Ac <sub>2</sub> O  | Acetic acid                         |
|------------|---------------------|-----------------------------------|--------------------|-----------------------------------|-----------------------------------|-------------------------------------|--------------------|-------------------------------------|
| EXP12      | Yield <sup>a</sup>  | 23.5 ± 0.6 %                      | 20.0 ± 0.7 %       | 9.4 ± 1.1 %                       | 12.4 ± 1.4 %                      | 30.5 ± 3.6 %                        | 6.0 ± 0.2 %        | 12.9 ± 0.4 %                        |
|            | Yield <sup>b</sup>  | 25.5 %                            | 20.5 %             | 12.2 %                            | 12.4 %                            | 32.0 %                              | 6.2 %              | 15.0 %                              |
|            | $k_{\text{wall}}^b$ | $8 \times 10^{-5} \text{ s}^{-1}$ | $0 \text{ s}^{-1}$ | $2 \times 10^{-4} \text{ s}^{-1}$ | $3 \times 10^{-4} \text{ s}^{-1}$ | $5 \times 10^{-4} \text{ s}^{-1}$   | $0 \text{ s}^{-1}$ | $5 \times 10^{-5} \text{ s}^{-1}$   |
| EXP13      | Yield <sup>a</sup>  | 23.0 ± 0.4 %                      | 19.1 ± 0.4 %       | 7.5 ± 0.5 %                       | 10.0 ± 0.7 %                      | 23.8 ± 4.2 %                        | 5.7 ± 0.2 %        | 12.5 ± 0.5 %                        |
|            | Yield <sup>b</sup>  | 24.0 %                            | 18.0 %             | 10.0 %                            | 11.0 %                            | 24.0 %                              | 5.8 %              | 14.0 %                              |
|            | $k_{\text{wall}}^b$ | $5 \times 10^{-5} \text{ s}^{-1}$ | $0 \text{ s}^{-1}$ | $2 \times 10^{-4} \text{ s}^{-1}$ | $5 \times 10^{-4} \text{ s}^{-1}$ | $1.1 \times 10^{-3} \text{ s}^{-1}$ | $0 \text{ s}^{-1}$ | $1.2 \times 10^{-4} \text{ s}^{-1}$ |
| EXP14      | Yield <sup>a</sup>  | 24.0 ± 0.6 %                      | 19.6 ± 0.6 %       | 8.3 ± 1.0 %                       | 7.1 ± 1.2 %                       | 18.3 ± 3.8 %                        | 4.8 ± 0.3 %        | 10.3 ± 4.2 %                        |
|            | Yield <sup>b</sup>  | 24.0 %                            | 19.0 %             | 9.0 %                             | 8.0 %                             | 19.0 %                              | 4.8 %              | 9.0 %                               |
|            | $k_{\text{wall}}^b$ | $5 \times 10^{-5} \text{ s}^{-1}$ | $0 \text{ s}^{-1}$ | $1 \times 10^{-4} \text{ s}^{-1}$ | $1 \times 10^{-4} \text{ s}^{-1}$ | $1.7 \times 10^{-3} \text{ s}^{-1}$ | $0 \text{ s}^{-1}$ | $2 \times 10^{-4} \text{ s}^{-1}$   |
| EXP15      | Yield <sup>a</sup>  | 24.1 ± 0.4 %                      | 16.3 ± 0.4 %       | 9.2 ± 0.6 %                       | 11.2 ± 0.6 %                      | 26.2 ± 1.8 %                        | 5.8 ± 0.2 %        | 12.8 ± 0.2 %                        |
|            | Yield <sup>b</sup>  | 26.0 %                            | 16.0 %             | 11.0 %                            | 12.0 %                            | 29.0 %                              | 6.0 %              | 13.0 %                              |
|            | $k_{\text{wall}}^b$ | $2 \times 10^{-4} \text{ s}^{-1}$ | $0 \text{ s}^{-1}$ | $2 \times 10^{-4} \text{ s}^{-1}$ | $2 \times 10^{-4} \text{ s}^{-1}$ | $9 \times 10^{-4} \text{ s}^{-1}$   | $0 \text{ s}^{-1}$ | $0 \text{ s}^{-1}$                  |
| EXP16      | Yield <sup>a</sup>  | 23.8 ± 0.4 %                      | 16.7 ± 0.4 %       | 9.4 ± 0.3 %                       | 10.3 ± 0.4 %                      | 23.6 ± 2.2 %                        | 6.1 ± 0.2 %        | 12.3 ± 0.2 %                        |
|            | Yield <sup>b</sup>  | 26.0 %                            | 16.0 %             | 11.0 %                            | 12.0 %                            | 28.0 %                              | 6.0 %              | 13.0 %                              |
|            | $k_{\text{wall}}^b$ | $2 \times 10^{-4} \text{ s}^{-1}$ | $0 \text{ s}^{-1}$ | $2 \times 10^{-4} \text{ s}^{-1}$ | $3 \times 10^{-4} \text{ s}^{-1}$ | $8 \times 10^{-4} \text{ s}^{-1}$   | $0 \text{ s}^{-1}$ | $8 \times 10^{-5} \text{ s}^{-1}$   |

|       |                              |                   |                                      |                   |                                      |                                      |                   |                   |
|-------|------------------------------|-------------------|--------------------------------------|-------------------|--------------------------------------|--------------------------------------|-------------------|-------------------|
| EXP17 | Yield <sup>a</sup>           | 23.6 ± 0.4 %      | 17.7 ± 0.4 %                         | 9.8 ± 0.4 %       | 10.3 ± 1.2 %                         | 24.8 ± 2.2 %                         | 5.9 ± 0.2 %       | 12.5 ± 0.2 %      |
|       | Yield <sup>b</sup>           | 23.5 %            | 17.5 %                               | 10.0 %            | 12.0 %                               | 28.0 %                               | 6.0 %             | 12.5 %            |
|       | $k_{\text{wall}}^{\text{b}}$ | 0 s <sup>-1</sup> | 5 × 10 <sup>-4</sup> s <sup>-1</sup> | 0 s <sup>-1</sup> | 5 × 10 <sup>-4</sup> s <sup>-1</sup> | 8 × 10 <sup>-4</sup> s <sup>-1</sup> | 0 s <sup>-1</sup> | 0 s <sup>-1</sup> |
| EXP18 | Yield <sup>a</sup>           | 24.4 ± 0.8 %      | 15.1 ± 0.6 %                         | 9.4 ± 0.7 %       | 11.8 ± 0.8 %                         | 23.6 ± 1.8 %                         | 6.2 ± 0.2 %       | 12.5 ± 0.6 %      |
|       | Yield <sup>b</sup>           | 25.0 %            | 14.7 %                               | 10.0 %            | 12.0 %                               | 28.0 %                               | 6.3 %             | 12.5 %            |
|       | $k_{\text{wall}}^{\text{b}}$ | 0 s <sup>-1</sup> | 0 s <sup>-1</sup>                    | 0 s <sup>-1</sup> | 0 s <sup>-1</sup>                    | 8 × 10 <sup>-4</sup> s <sup>-1</sup> | 0 s <sup>-1</sup> | 0 s <sup>-1</sup> |
| EXP19 | Yield <sup>a</sup>           | 23.0 ± 1.0 %      | 16.2 ± 0.6 %                         | 8.9 ± 0.8 %       | 11.8 ± 1.6 %                         | 26.3 ± 1.8 %                         | 5.9 ± 0.2 %       | 12.3 ± 0.6 %      |
|       | Yield <sup>b</sup>           | 22.5 %            | 15.7 %                               | 8.5 %             | 10.0 %                               | 25.0 %                               | 5.8 %             | 12.0 %            |
|       | $k_{\text{wall}}^{\text{b}}$ | 0 s <sup>-1</sup> | 0 s <sup>-1</sup>                    | 0 s <sup>-1</sup> | 0 s <sup>-1</sup>                    | 0 s <sup>-1</sup>                    | 0 s <sup>-1</sup> | 0 s <sup>-1</sup> |
| EXP20 | Yield <sup>a</sup>           | 24.2 ± 0.4 %      | 15.5 ± 0.4 %                         | 9.6 ± 0.6 %       | 11.1 ± 0.8 %                         | 25.9 ± 1.2 %                         | 6.0 ± 0.2 %       | 12.8 ± 0.4 %      |
|       | Yield <sup>b</sup>           | 24.0 %            | 15.5 %                               | 9.5 %             | 10.5 %                               | 26.0 %                               | 5.9 %             | 13.0 %            |
|       | $k_{\text{wall}}^{\text{b}}$ | 0 s <sup>-1</sup> | 0 s <sup>-1</sup>                    | 0 s <sup>-1</sup> | 0 s <sup>-1</sup>                    | 0 s <sup>-1</sup>                    | 0 s <sup>-1</sup> | 0 s <sup>-1</sup> |

<sup>a</sup> Experimentally determined product yield and the corresponding statistical uncertainty (2σ), <sup>b</sup> parameters obtained through modelling.

## G. FTIR spectra

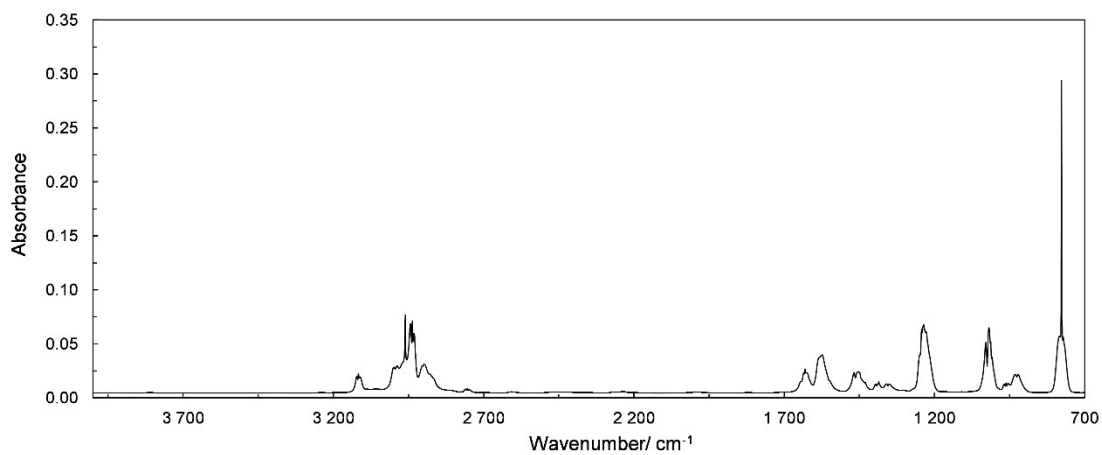

**Fig. S22** Reference spectrum of 2,5-dimethylfuran.

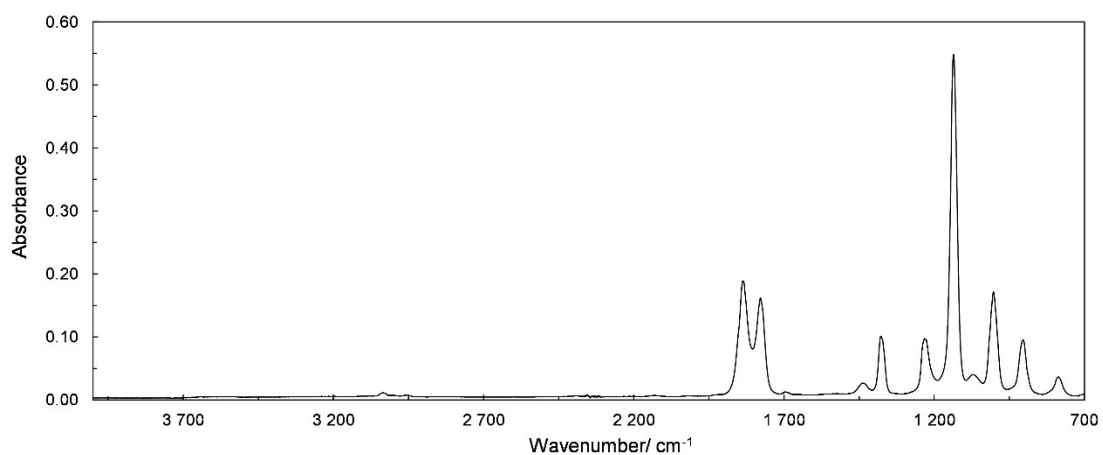

**Fig. S23** Reference spectrum of acetic anhydride.

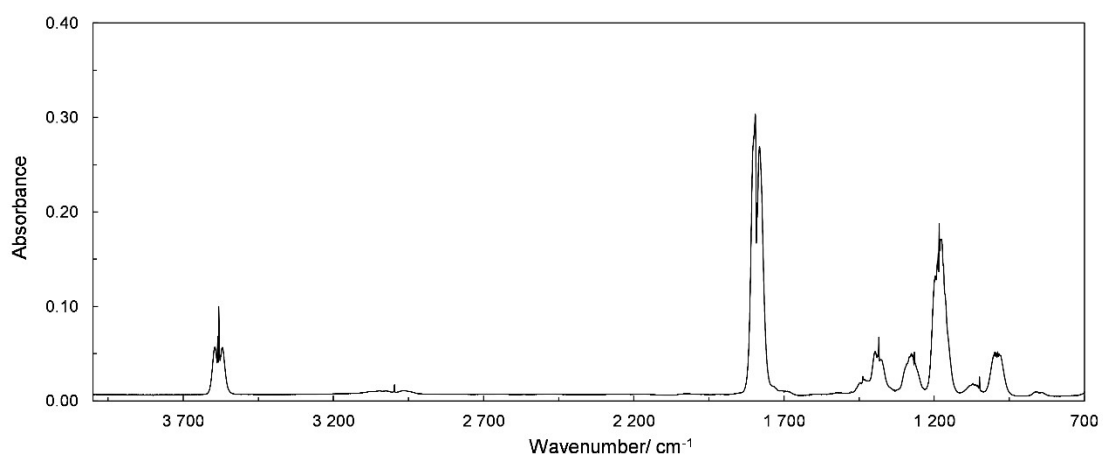

**Fig. S24** Reference spectrum of acetic acid.

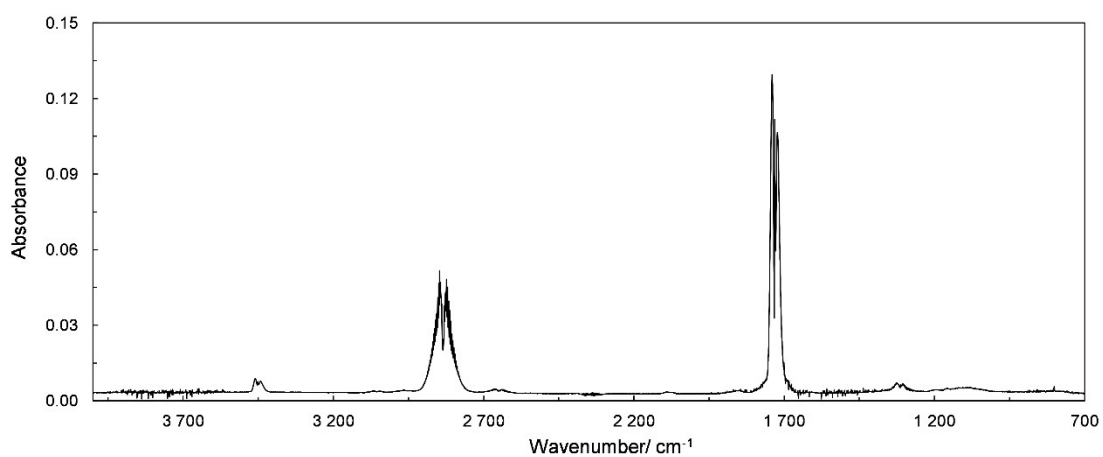

**Fig. S25** Reference spectrum of glyoxal.

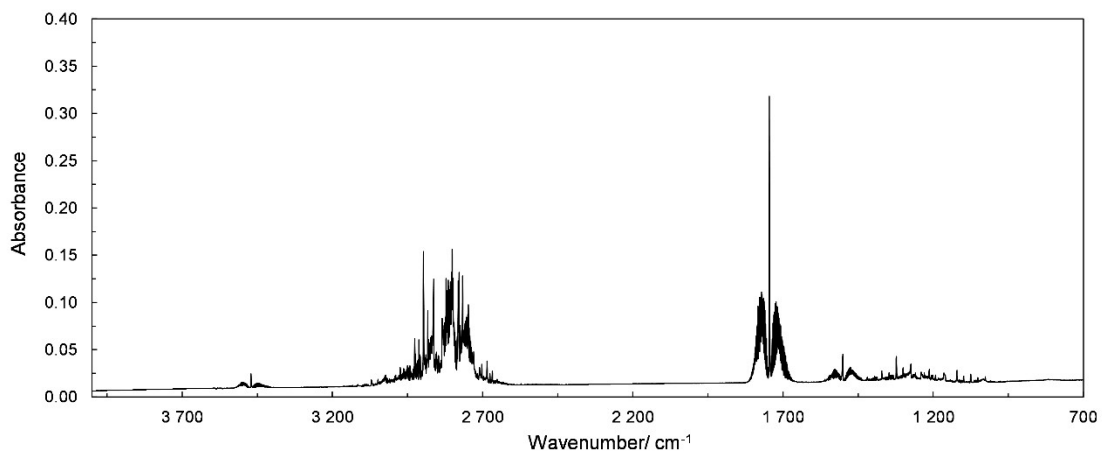

**Fig. S26** Reference spectrum of formaldehyde.

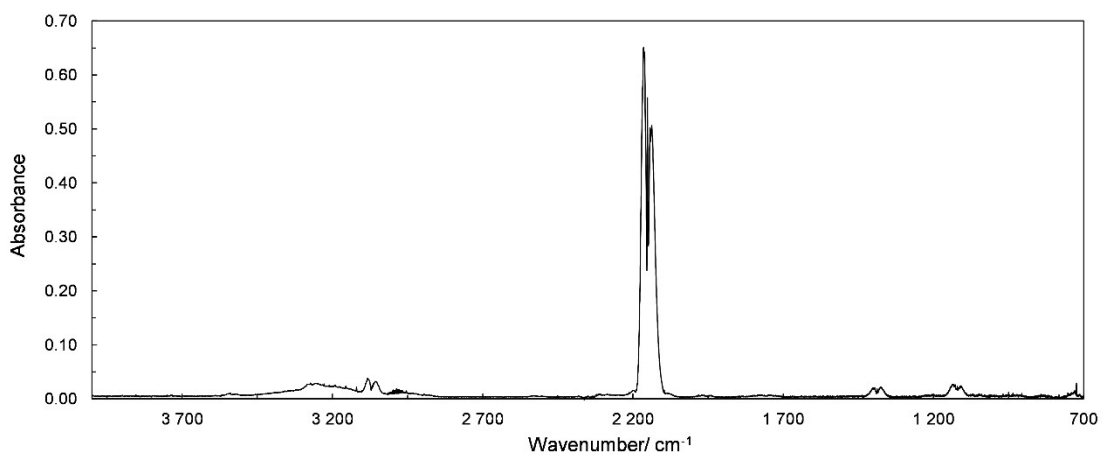

**Fig. S27** Reference spectrum of ketene.

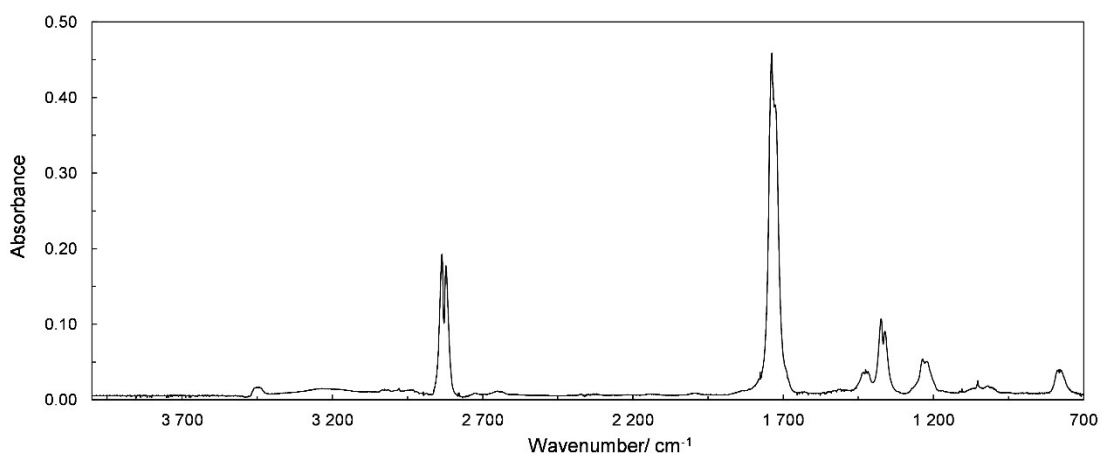

**Fig. S28** Reference spectrum of methyl glyoxal.

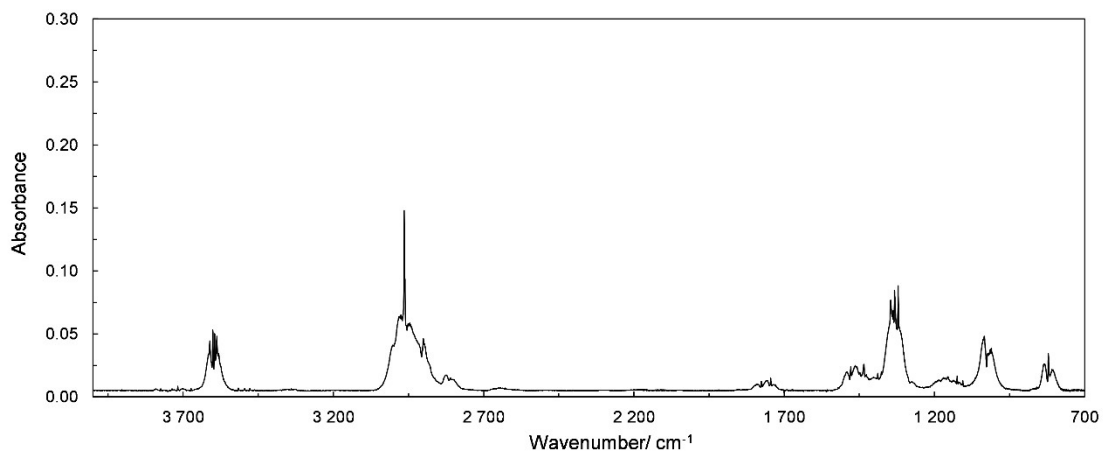

**Fig. S29** Reference spectrum of methyl hydroperoxide.

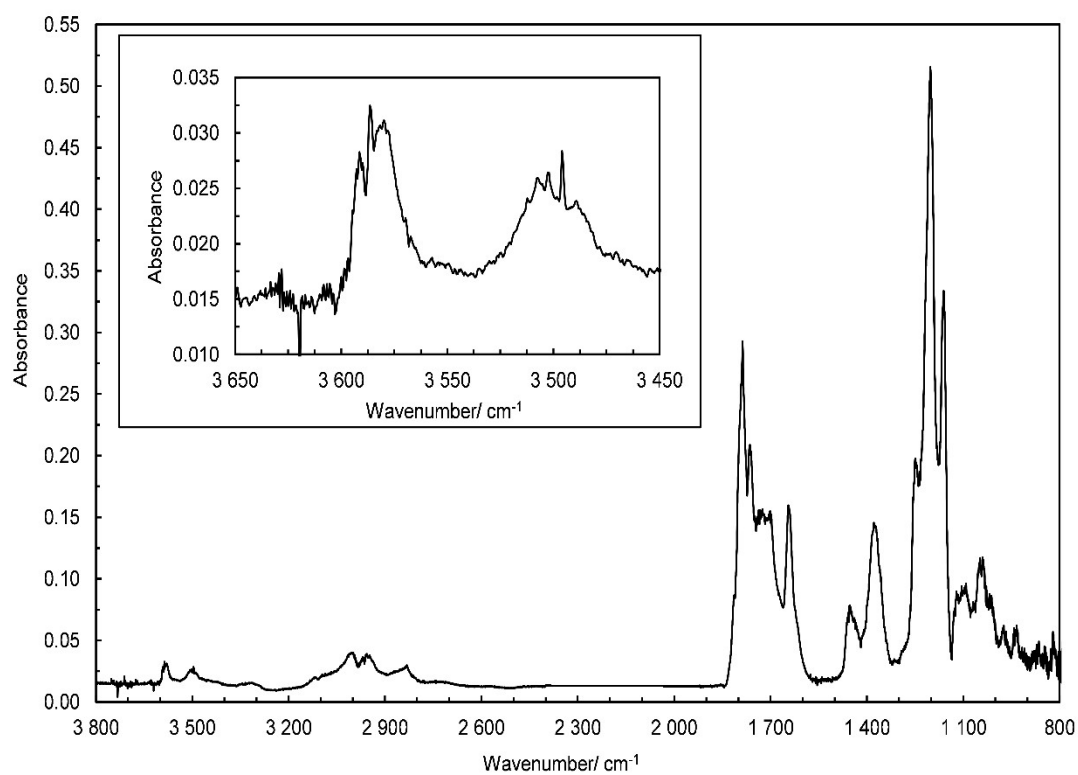

**Fig. S30** Residual FTIR spectrum from experiment EXP18. The spectrum was cut in the range 2400 – 1950 cm<sup>-1</sup> and shifted vertically for readability reasons.

## **H. Time profiles of PTR-MS data**

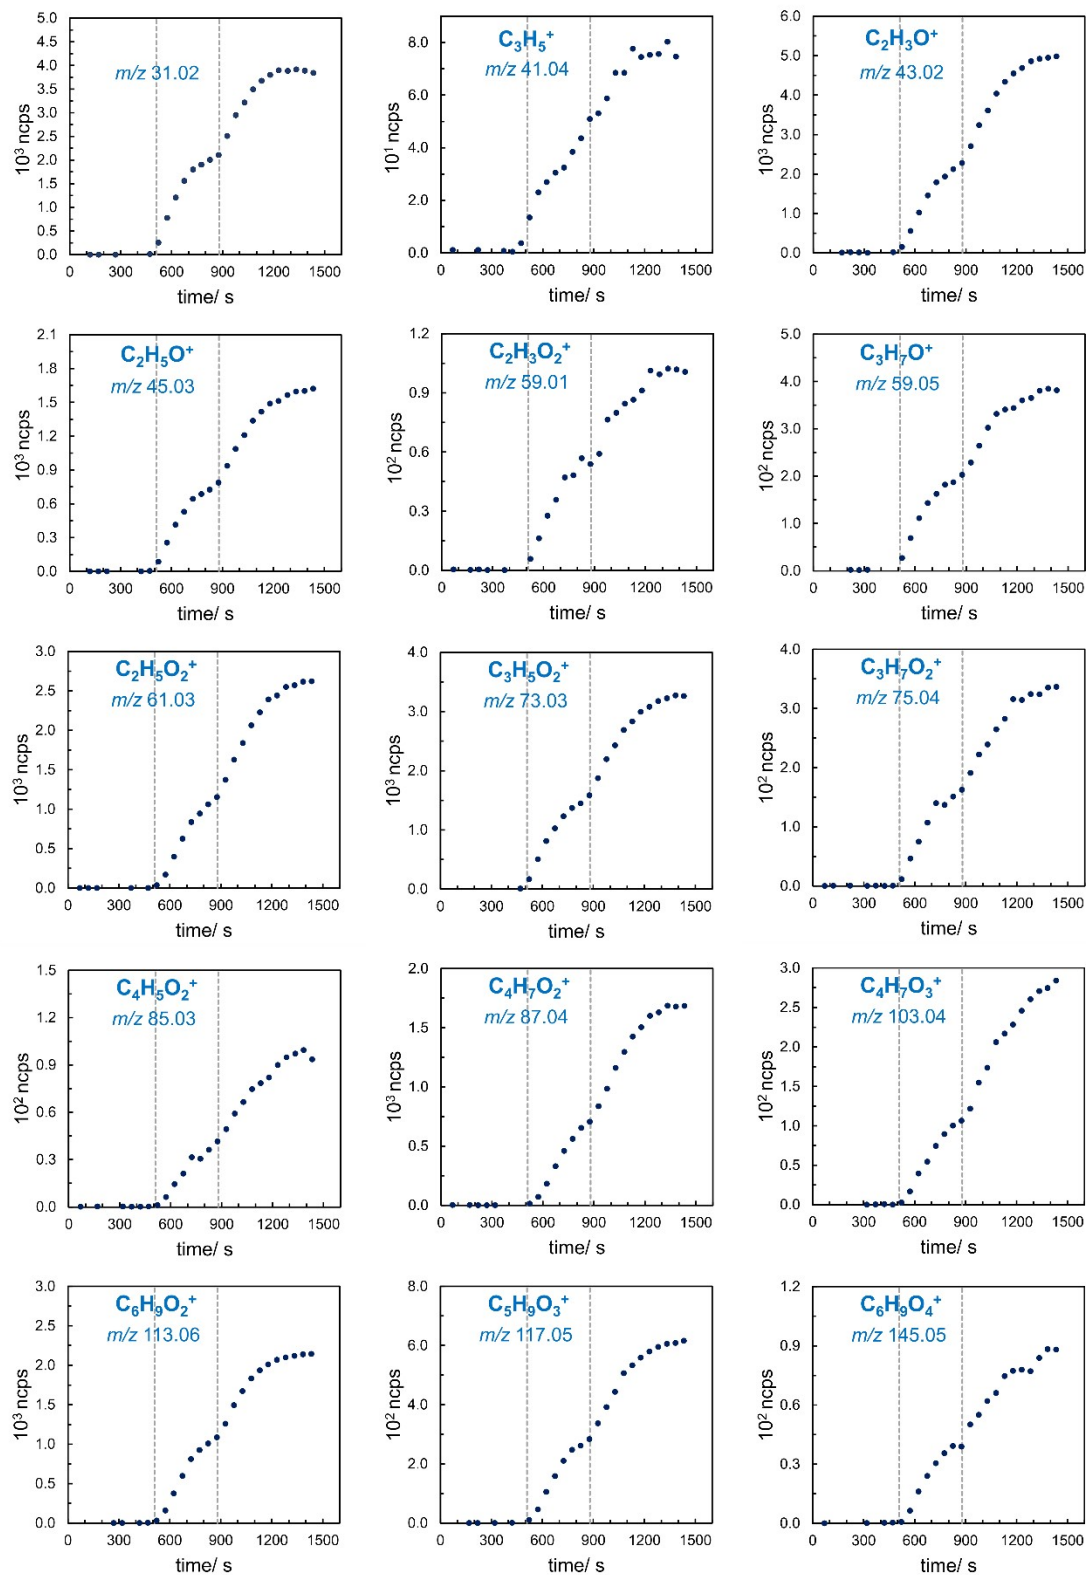

**Fig. S31** Time profiles of  $m/z$  signals of products in EXP12. The vertical dotted lines mark the respective start of  $O_3$  addition for a period of about 1 min.

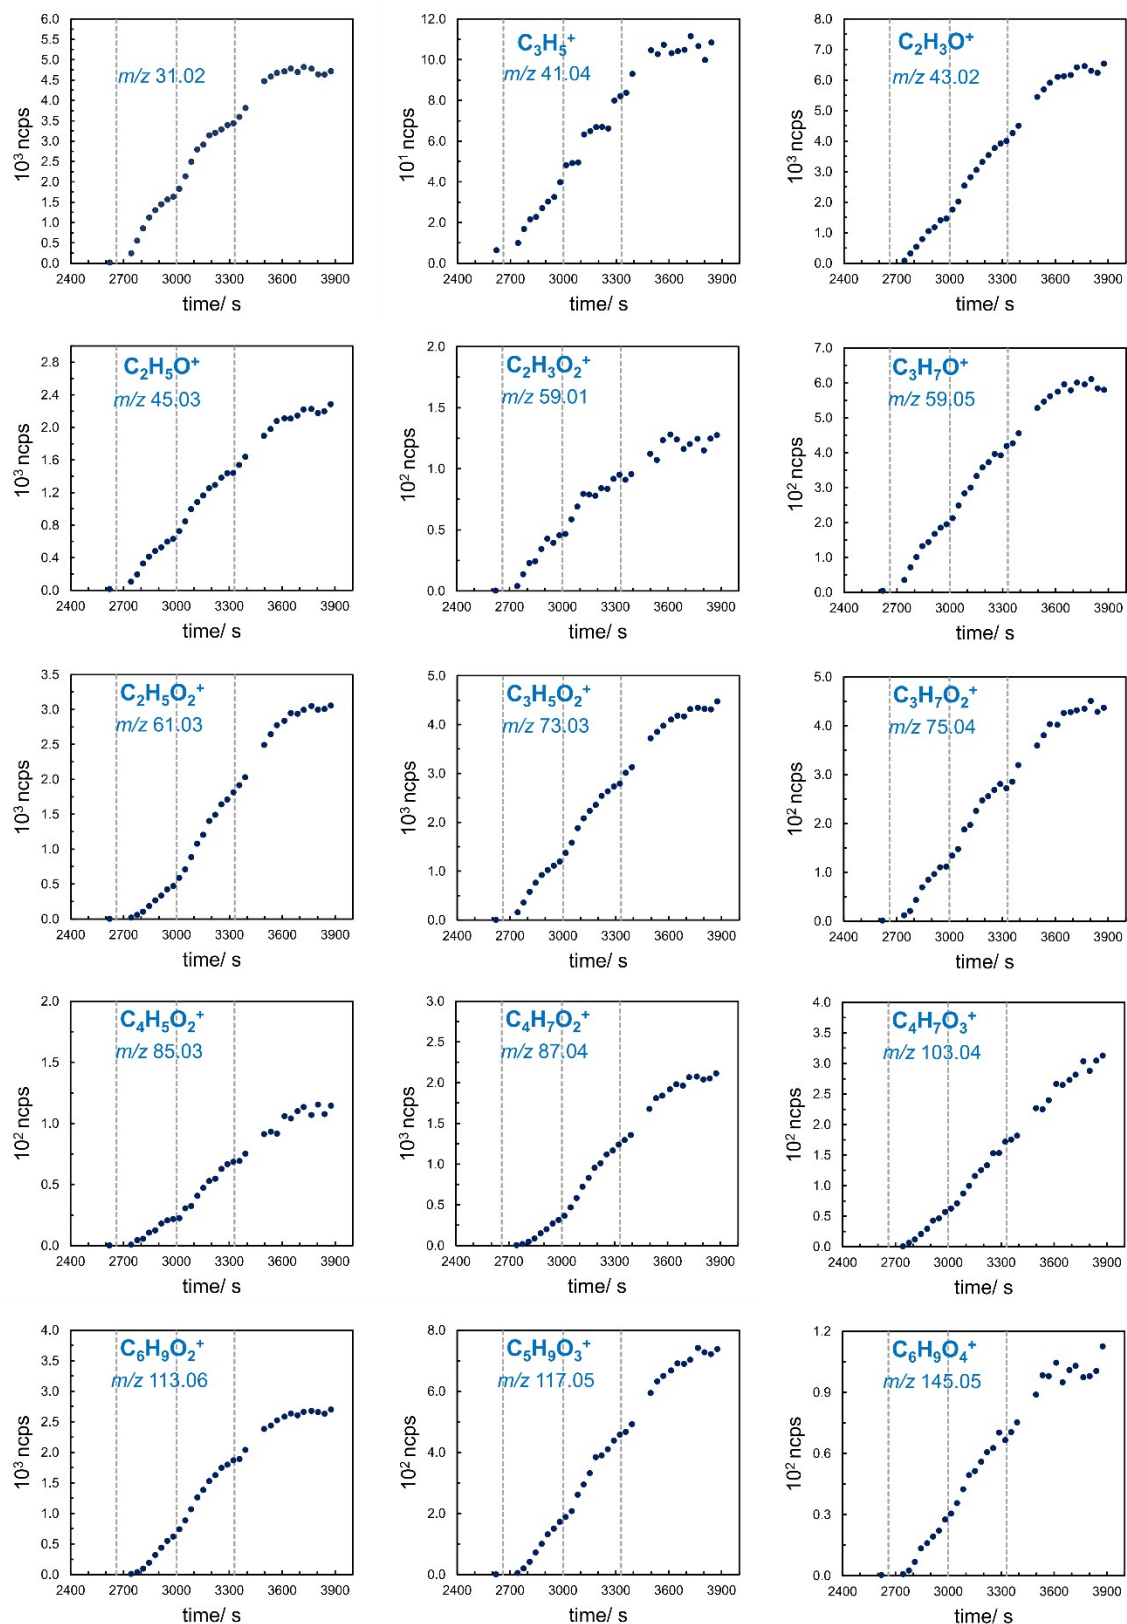

**Fig. S32** Time profiles of  $m/z$  signals of products in EXP13. The vertical dotted lines mark the respective start of  $O_3$  addition for a period of about 1 min.



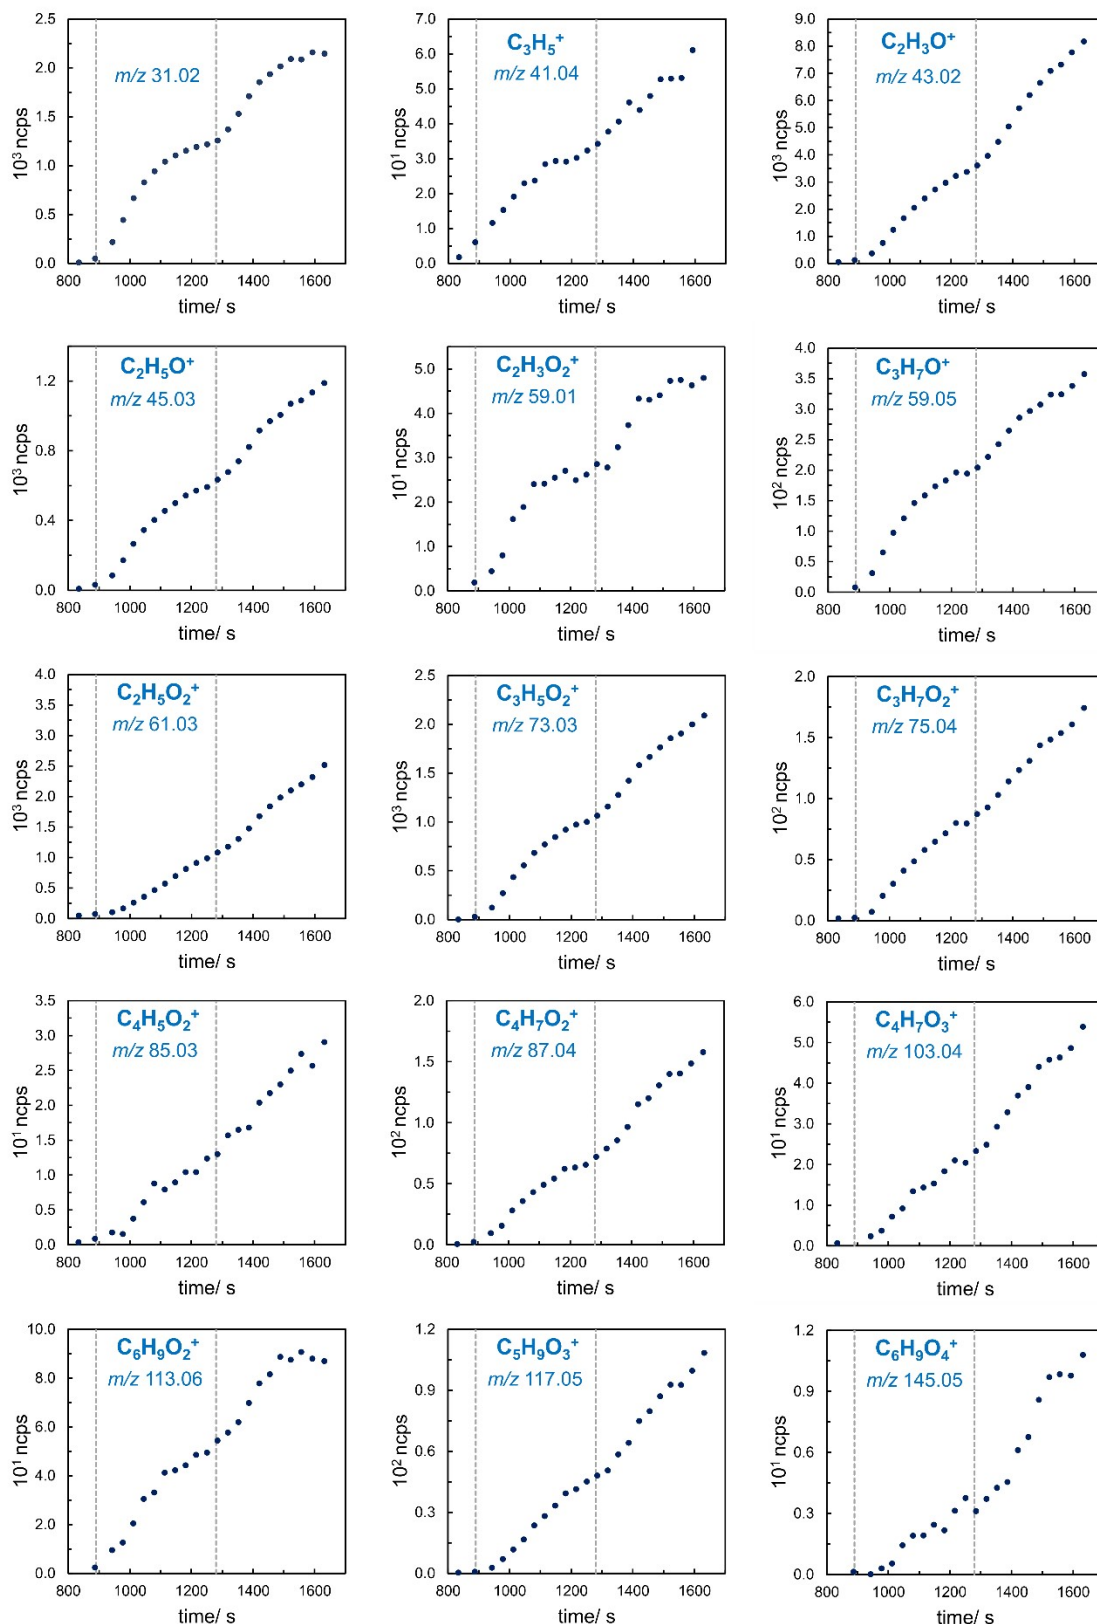

**Fig. S33** Time profiles of  $m/z$  signals of products in EXP14. The vertical dotted lines mark the respective start of  $O_3$  addition for a period of about 1 min.

## References

- 1 S. Hatakeyama, S. Honda, N. Washida, and H. Akimoto, Rate Constants and Mechanism for Reactions of Ketenes with OH Radicals in Air at  $299 \pm 2$  K, *Bull. Chem. Soc. Jpn.*, 1985, **58**, 2157–2162.
- 2 E. C. Tuazon, S. M. Aschmann, J. Arey, and R. Atkinson, Products of the Gas-Phase Reactions of O<sub>3</sub> with a Series of Methyl-Substituted Ethenes, *Environ. Sci. Technol.*, 1997, **31**, 3004–3009.
- 3 F. Halverson, and V. Z. Williams, The Infra-Red Spectrum of Ketene, *J. Chem Phys.*, 1947, **15**, 552–559.
- 4 T. J. Wallington, J. C. Ball, A. M. Straccia, M. D. Hurley, E. W. Kaiser, M. Dill, and W. F. Schneider, Kinetics and Mechanism of the Reaction of Cl Atoms with CH<sub>2</sub>CO (Ketene), *Int. J. Chem. Kin.*, 1996, **28**, 627–635.
- 5 R. Volkamer, P. Spietz, J. Burrows, and U. Platt, High-resolution absorption cross-section of glyoxal in the UV–vis and IR spectral ranges, *J. Photochem. Photobiol.*, 2005, **172**, 35–46.
- 6 R. K. Talukdar, L. Zhu, K. J. Feierabend, and J. B. Burkholder, Rate coefficients for the reaction of methylglyoxal (CH<sub>3</sub>COCHO) with OH and NO<sub>3</sub> and glyoxal (HCO)<sub>2</sub> with NO<sub>3</sub>, *Atmos. Chem. Phys.*, 2011, **11**, 10837–10851.
- 7 N. Illmann, R. G. Gibilisco, I. G. Bejan, I. Patroescu-Klotz and P. Wiesen, Atmospheric oxidation of  $\alpha,\beta$ -unsaturated ketones: kinetics and mechanism of the OH radical reaction, *Atmos. Chem. Phys.*, 2021, **21**, 13667–13686.
